# Supplementary material
Source: publisher figshare collection journal article supplement (https://asha.figshare.com/articles/dataset/_/16725601)
Supplement: Supplementary file 1 [file 1]

### Supplemental Material S3. Parent satisfaction survey.

1. Please rate your satisfaction with Lucas' therapy progress to date using this line. Place a line or dot where your satisfaction falls.

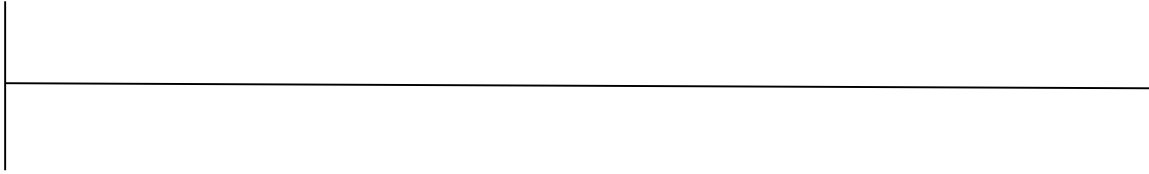

**Not satisfied**

**Very satisfied**

2. From the beginning of therapy, how much general progress do you feel Lucas has made?
  - 1 - no progress
  - 2 - minimal progress
  - 3 - fair amount of progress
  - 4 - substantial progress
  - 5 - large amount of progress
3. From the beginning of therapy, how much progress on targeted goals do you feel Lucas has made?
  - 1 - no progress
  - 2 - minimal progress
  - 3 - fair amount of progress
  - 4 - substantial progress
  - 5 - large amount of progress
4. Please rate your agreeance with this statement: I feel Lucas' progress has generalized outside the therapy room.
  - 1 - strongly disagree
  - 2 - disagree
  - 3 - neutral
  - 4 - agree
  - 5 - strongly agree
5. In your own words, please briefly describe Lucas' progress:

---

---

---

8. Please make any additional comments/concerns about Lucas' progress here.

---

---

---
