# Supplementary material
Source: publisher figshare collection journal article supplement (https://asha.figshare.com/articles/dataset/_/16725601)
Supplement: Supplementary file 2 [file 1]

## **Supplemental Material S2. Focused stimulation dose sheet**

An example of a focused stimulation dose sheet used in one of the treatment sessions is shown below. The target behavior was SV/SVO sentences. In this example, the therapy task used for focused stimulation implementation was looking at and describing different picture scenes. Twenty-four distinct SV/SVO sentences, with 24 different verbs, were presented to Lucas. Administering the sentences in SV/SVO format provided the consistency aspect of statistical learning. Variability was implemented through use of diverse subjects, verbs, and objects. For this session, administration of the 24 sentences took six minutes.

1. PLAYER JUMP
2. COACH EXPLAIN
3. WOMAN WATCH BASKETBALL
4. DAD READ BOOK
5. SON SEE BOOK
6. SISTER SLEEP
7. GIRL MAKE PIZZA
8. HE FIND CHEESE
9. BOY COOK PIZZA
10. MAN LIKE CEREAL
11. HE HAVE FOOD
12. BOY BUILD
13. GIRL PLAY
14. SHE STAND
15. STUDENT OPEN BOX
16. DOCTOR MEET MAN
17. WOMAN WANT PAPER
18. MAN TEACH STUDENT
19. STUDENT WORK
20. DAUGHTER KISS-FIST ICE-CREAM
21. MOM BUY ICE-CREAM
22. CHILD EAT
23. SHE CRY
24. CHILDREN SEARCH-FOR DOG
