# Supplementary material
Source: publisher figshare collection journal article supplement (https://asha.figshare.com/articles/dataset/_/16725601)
Supplement: Supplementary file 3 [file 1]

### **Supplemental Material S1. Sample Protocol**

This is the protocol that was used for Session 5. Probe data was collected at the beginning of the session. Following data collection, both target behaviors (SV/SVO sentences and pronouns) received intervention.

Start time: 4:00p, End time: 4:45p

1. Official data collection for SV/SVO sentences, NDV, pronouns, and adjective/noun phrases

- Structured activity (picture description): 4:00-4:05

- Unstructured activity (free play): 4:05-4:10

2. SV/SVO intervention

- Cookie decorating activity 4:15-4:30

3. Pronoun intervention

- Picture scenes and reinforcement game 4:30-4:45
